# Supplementary material for: Textural quality, growth parameters and oxidative responses in Nile tilapia (Oreochromis niloticus) fed faba bean water extract diet
Source: PeerJ. 2022 Mar 14;10:e13048. doi: 10.7717/peerj.13048 (PMC8929169; doi:10.7717/peerj.13048)
Supplement: File S1 [file peerj-10-13048-s002.xlsx]

## Sheet: Sheet1
Texture quality
Hardness						Chewiness					Gumminess					Cohesiveness					Springiness					Adhesiveness
Control	EPD	PD	F(2,15) =0.332		Control	EPD	PD	F(2,15) =0.02		Control	EPD	PD	F(2,15) =0.18		Control	EPD	PD	F(2,15) =0.17		Control	EPD	PD	F(2,15) =0.85		Control	EPD	PD	F(2,15) =0.15
589.63	803.26	1101.29	ES =0.98		234.45	450.07	574.77	ES =0.96		353.71	691.27	758.12	ES =0.98		0.72	0.78	0.7	ES =0.17		0.66	0.69	0.62	ES =0.37		20.17	35.2	38.77	ES =0.84
503.62	885.33	1121.2	P(Control vs EPD) <0.001		247.75	476.94	517.65	P(Control vs EPD) <0.001		380.46	626.09	820.03	P(Control vs EPD) <0.001		0.76	0.68	0.71	P(Control vs EPD) =0.9		0.65	0.64	0.6	P(Control vs EPD) =0.08		24.33	48.95	35.62	P(Control vs EPD) <0.001
551.69	922.14	1072.54	P(Control vs PD) <0.001		228.98	405.65	508.24	P(Control vs PD) <0.001		390.54	613.61	774.31	P(Control vs PD) <0.001		0.77	0.73	0.72	P(Control vs PD) =0.32		0.6	0.71	0.66	P(Control vs PD) =1		27.34	47.43	42.31	P(Control vs PD) <0.001
539.61	919.38	1061.16	P(EPD vs PD) <0.001		229.41	402.18	503.04	P(EPD vs PD) <0.001		385.69	608.7	769.73	P(EPD vs PD) <0.001		0.74	0.72	0.74	P(EPD vs PD) =1		0.59	0.7	0.68	P(EPD vs PD) =0.06		27.44	45.59	41.41	P(EPD vs PD) =0.21
568.34	820.61	1080.52			239.14	441.98	565.12			344.21	681.35	748.51			0.71	0.75	0.72			0.64	0.68	0.61			21.51	39.23	42.61
512.35	865.31	1031.52			243.18	481.32	522.64			385.24	631.51	824.98			0.75	0.69	0.7			0.67	0.65	0.62			23.61	46.52	34.91
Hematological indexes and immune parameters
RBC					HGB					G6DP					TP					ALB					GLB
Control	EPD	PD	F(2,15) =0.23		Control	EPD	PD	F(2,15) =0.51		Control	EPD	PD	F(2,15) =0.02		Control	EPD	PD	F(2,15) =0.43		Control	EPD	PD	F(2,15) =0.04		Control	EPD	PD	F(2,15) =0.39
2.63	2.49	2.45	ES =0.27		95.961	103.984	93.7684	ES =0.72		45.42	38.4747	36.5842	ES =0.63		49.7543	39.3729	43.2541	ES =0.31		9.55721	7.04029	8.03535	ES =0.37		36.7779	31.0221	37.2567	ES =0.36
2.61	2.42	2.42	P(Control vs EPD) =0.43		103.95	99.2753	92.53	P(Control vs EPD) =0.06		41.59	40.51	39.01	P(Control vs EPD) =0.02		50.31	46.62	45.12	P(Control vs EPD) =0.34		8.3421	7.43968	8.57231	P(Control vs EPD) =0.09		38.5462	34.6213	35.3121	P(Control vs EPD) =0.06
2.51	2.52	2.39	P(Control vs PD) =0.1		99.659	85.5769	90.6101	P(Control vs PD) =0.005		39.42	40.6389	38.4747	P(Control vs PD) =0.01		51.327	48.7394	46.2894	P(Control vs PD) =0.07		8.2354	7.2354	8.46459	P(Control vs PD) =0.37		40.1199	33.6508	34.2631	P(Control vs PD) =0.08
2.43	2.38	2.46	P(EPD vs PD) =1		108.481	90.3855	87.9725	P(EPD vs PD) =0.73		43.7898	36.8993	38.7898	P(EPD vs PD) =0.86		42.8462	47.4188	41.3549	P(EPD vs PD) =1		8.1243	8.73775	7.87926	P(EPD vs PD) =0.39		35.6638	37.4782	34.2143	P(EPD vs PD) =1
2.43	2.54	2.39			100.32	94.31	90.12			41.37	37.51	37.61			45.25	43.21	44.23			9.3598	7.24121	8.13987			37.8123	37.6541	33.2151
2.52	2.43	2.49			99.32	91.35	89.99			45.82	37.92	38.24			48.35	45.32	41.68			8.2214	8.32298	7.8931			36.7219	34.1021	35.3691
Oxidative and antioxidative parameters of serum and hepatopancreas
serum
ROS					H2O2					MDA					SOD					NADPH					GSH
Control	EPD	PD	F(2,15) =0.27		Control	EPD	PD	F(2,15) =0.11		Control	EPD	PD	F(2,15) =0.42		Control	EPD	PD	F(2,15) =0.98		Control	EPD	PD	F(2,15) =0.01		Control	EPD	PD	F(2,15) =0.87
334.245	489.321	507.477	ES =0.96		59.7246	75.3194	73.2828	ES =0.82		2.43764	4.29524	4.46576	ES =0.91		197.999	162.154	170.257	ES =0.84		9.0493	8.55492	6.8303	ES =0.82		16.2095	14.1931	12.0948	ES =0.88
375.533	506.291	543.437	P(Control vs EPD) <0.001		62.8534	70.3655	76.1969	P(Control vs EPD) <0.001		2.56469	3.69229	4.11637	P(Control vs EPD) <0.001		209.69	181.112	162.927	P(Control vs EPD) <0.001		10.009	8.41805	7.00905	P(Control vs EPD) =0.05		15.7505	15.1112	12.3571	P(Control vs EPD) <0.001
350.268	519.687	551.355	P(Control vs PD) <0.001		62.4895	69.3685	68.2157	P(Control vs PD) <0.001		2.97985	3.74931	4.02312	P(Control vs PD) <0.001		195.646	169.215	173.215	P(Control vs PD) <0.001		8.69255	8.4413	7.71255	P(Control vs PD) <0.001		17.1237	13.4531	13.247	P(Control vs PD) <0.001
355.58	524.826	561.972	P(EPD vs PD) =0.02		60.5068	67.69	68.1508	P(EPD vs PD) =1		2.88232	3.75699	3.91462	P(EPD vs PD) =0.23		193.453	171.246	179.679	P(EPD vs PD) =1		8.66605	8.3633	7.91242	P(EPD vs PD) =0.003		17.144	13.3899	13.2588	P(EPD vs PD) =0.001
344.216	499.125	513.987			59.1213	71.365	74.3125			2.51367	4.21024	4.26987			200.214	168.322	174.322			9.24122	8.51322	6.93154			15.6932	15.0124	12.2632
370.65	501.965	548.654			61.346	72.4137	75.1933			2.60125	3.78215	4.21313			205.955	178.214	164.322			9.81246	8.38255	7.1237			16.2932	14.2532	12.1822
hepatopancreas
ROS					H2O2					MDA					SOD					NADPH					GSH
Control	EPD	PD	F(2,15) =0.53		Control	EPD	PD	F(2,15) =0.5		Control	EPD	PD	F(2,15) =0.19		Control	EPD	PD	F(2,15) =0.67		Control	EPD	PD	F(2,15) =0.08		Control	EPD	PD	F(2,15) =0.45
493.891	484.548	557.654	ES =0.84		59.2032	71.0377	86.5802	ES =0.93		3.39053	4.23225	4.35877	ES =0.93		188.906	148.772	141.741	ES =0.87		8.19905	8.5823	7.02192	ES =0.88		21.2423	15.3407	17.6522	ES =0.48
460.861	500.331	550.407	P(Control vs EPD) =0.002		59.2032	75.4764	76.6723	P(Control vs EPD) <0.001		3.27936	4.62929	4.26348	P(Control vs EPD) <0.001		173.968	153.71	130.968	P(Control vs EPD) <0.001		10.2135	8.71917	6.52917	P(Control vs EPD) =0.53		18.6194	17.9801	18.4882	P(Control vs EPD) =0.01
477.981	520.312	541.988	P(Control vs PD) <0.001		58.6125	67.8954	83.679	P(Control vs PD) <0.001		3.29452	4.29312	4.66214	P(Control vs PD) <0.001		180.365	159.355	135.825	P(Control vs PD) <0.001		9.25216	9.09355	6.78127	P(Control vs PD) <0.001		18.126	17.4037	16.7837	P(Control vs PD) =0.04
452.603	524.548	521.417	P(EPD vs PD) =0.001		53.7278	66.4272	81.887	P(EPD vs PD) <0.001		3.08878	4.1846	4.88232	P(EPD vs PD) =0.47		173.968	163.906	153.411	P(EPD vs PD) =0.01		9.2683	9.29404	6.66605	P(EPD vs PD) <0.001		18.062	17.8162	16.2915	P(EPD vs PD) =1
462.125	496.322	549.312			56.3155	72.3188	82.6132			3.28945	4.32548	4.47322			178.255	152.315	143.512			8.76346	8.68125	6.82367			20.2137	16.4152	17.4832
475.22	516.632	548.395			57.3156	73.4012	78.7424			3.19215	4.43689	4.37124			176.214	153.756	146.651			9.67216	8.82357	6.62389			18.9199	17.5791	18.147
	507.116	544.862
The digestive enzymes of tilapia
Lipase					Amylase					Trypsin
Control	EPD	PD	F(2,15) =0.01		Control	EPD	PD	F(2,15) =0.04		Control	EPD	PD	F(2,15) =o.18
340.882	375.683	355.567	ES =0.77		256.349	313.023	285.266	ES =0.87		1616.21	1567.31	1669.54	ES =0.21
335.528	381.037	362.897	P(Control vs EPD) =0.002		235.351	308.2	275.266	P(Control vs EPD) <0.001		1443.12	1522.47	1564.99	P(Control vs EPD) =0.24
340.981	408.313	366.214	P(Control vs PD) =0.002		252.399	315.688	309.257	P(Control vs PD) = 0.002		1620.36	1483.27	1544.24	P(Control vs PD) =1
357.497	418.515	375.255	P(EPD vs PD) =0.03		257.409	325.082	319.355	P(EPD vs PD) = 0.08		1713.5	1432.79	1496.35	P(EPD vs PD) =0.41
347.622	380.22	360.37			251.366	318.27	293.956			1657.37	1466.99	1571.62
345.622	385.955	367.952			245.32	313.699	280.965			1490.33	1573.61	1612.68
Collagen content (μg/mg)
Control	EPD	PD	F(2,15) =0.53
38.6708	70.2024	63.4907	ES =0.9
46.2384	75.5628	64.3465	P(Control vs EPD) <0.001
49.7069	77.4547	72.2023	P(Control vs PD) <0.001
48.51	67.34	66.67	P(EPD vs PD) <0.001
37.54	77.54	61.34
47.54	72.67	69.34
Initial weight
Cntrol1	526	EPD1	514.26	PD1	506.32
	495.78		498.24		494.68
	474.21		486.89		494.52
	480.21		497.68		494.87
	488.12		489.25		497.25
	520.42		502.69		507.63
	505.39		503.86		506.87
	511.58		505.65		510.49
	489.23		495.74		491.02
	512.65		511.07		503.89
Cntrol2	502.21	EPD2	519.21	PD2	504.65
	491.32		493.51		493.52
	525.62		500.78		506.25
	508.98		507.61		507.64
	504.78		504.89		520.14
	510.54		514.25		510.46
	498.36		481.25		496.87
	490.68		486.78		491.24
	496.85		496.12		480.25
	476.21		498.92		494.12
Cntrol3	504.62	EPD3	514.69	PD3	503.34
	477.85		493.82		496.81
	507.32		504.63		508.67
	522.87		507.46		504.38
	492.51		477.89		498.21
	507.64		502.98		519.24
	493.19		496.52		492.57
	508.21		516.16		501.62
	496.21		486.25		497.61
	492.87		497.42		481.62
	Boby length	Final Weight	visceral weight	hepatopancreas weight
Control	33.25	1502.62	101.1	25.19
	35.95	1655.64	119.81	33.07
	34.93	1567.54	104.18	26.85
	33.51	1547.62	103.65	26.31
	36.11	1610.64	120.14	32.65
	34.61	1572.54	107.31	28.95
EPD	33.21	1533.54	108.1	25.17
	34.82	1589.54	114.18	28.19
	35.46	1664.57	119.61	33.91
	33.42	1526.42	107.12	26.42
	35.23	1598.21	115.43	31.87
	36.12	1634.23	116.64	32.89
PD	36.05	1643.63	117.25	29.34
	33.12	1549.13	104.18	31.31
	34.43	1589.41	113.52	24.85
	35.78	1592.34	111.32	27.98
	33.23	1531.13	101.87	31.23
	34.13	1584.21	114.34	25.67
